# Supplementary figures and images for: H2A histone-fold and DNA elements in nucleosome activate SWR1-mediated H2A.Z replacement in budding yeast
Source: eLife journal article supplement (doi:10.7554/elife.06845), 2015-06-27

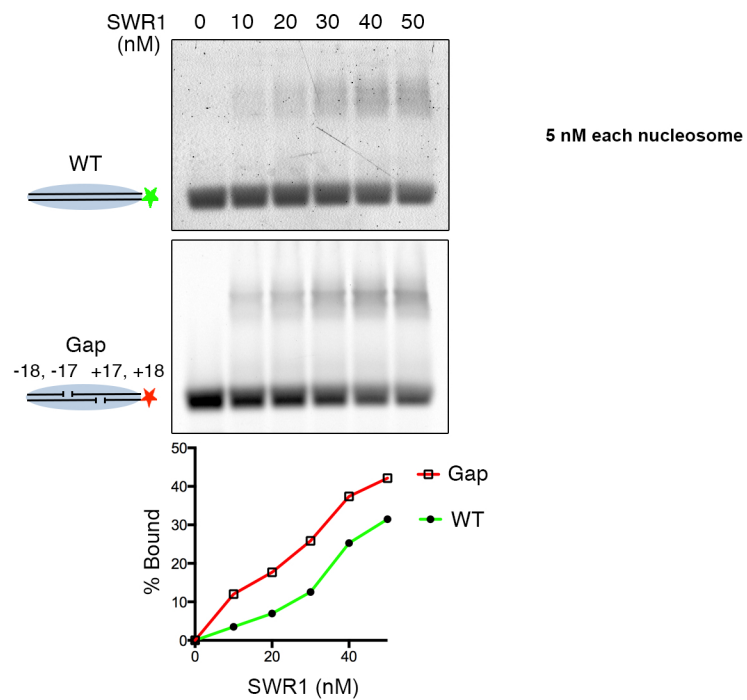

**Fig S3.1**

Supplement: supp [file elife-06845-supp-v1.zip]

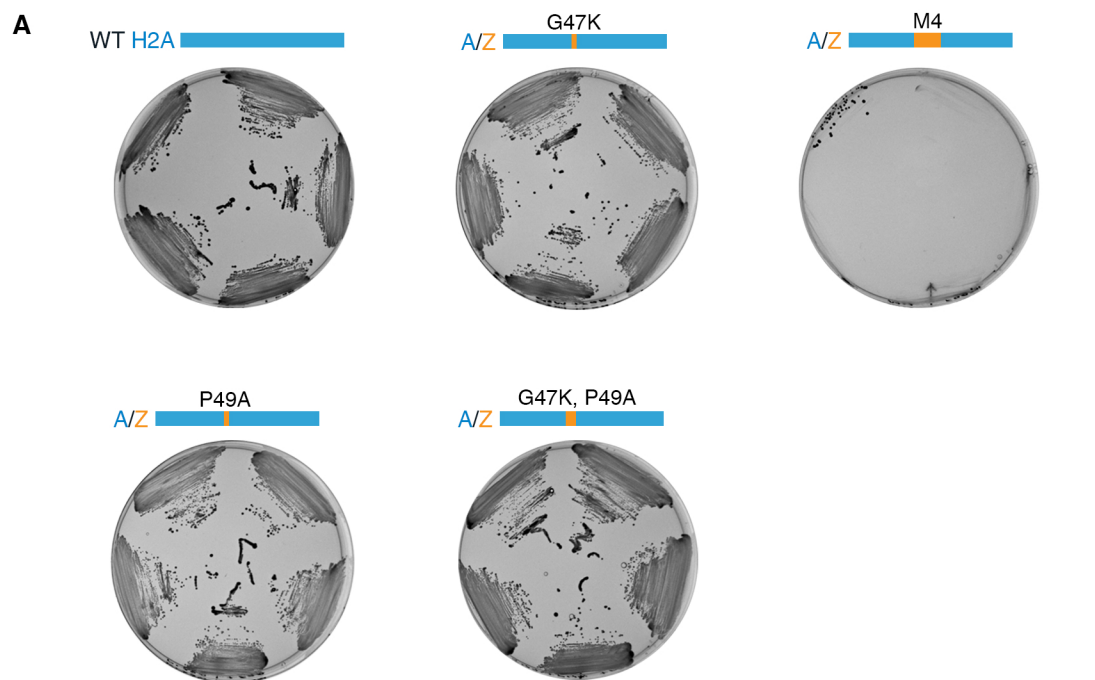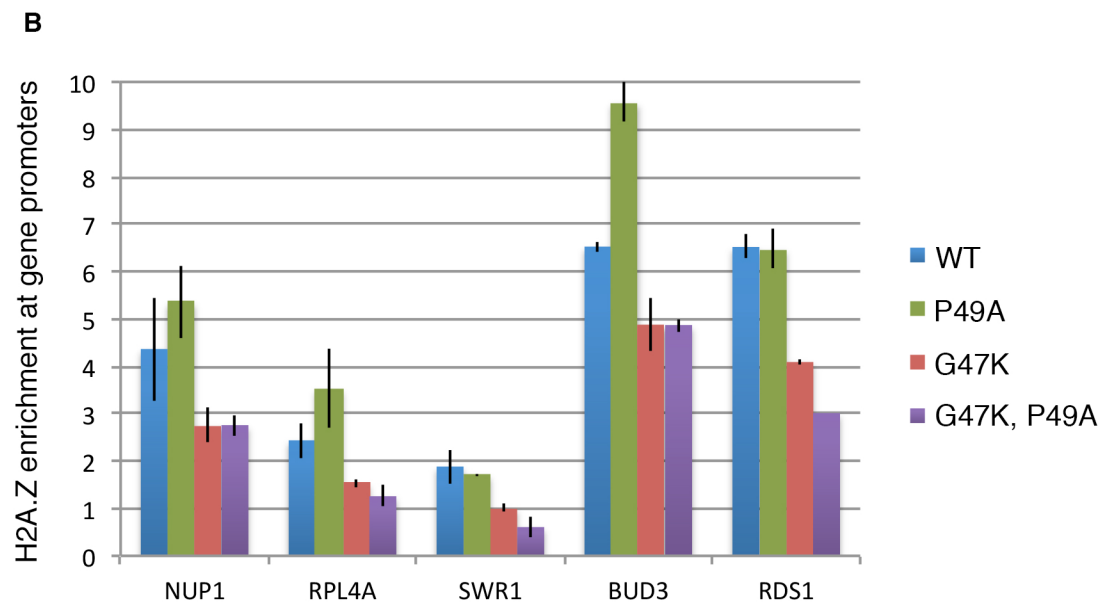

**Fig S1.2**

Supplement: supp [file elife-06845-supp-v1.zip]

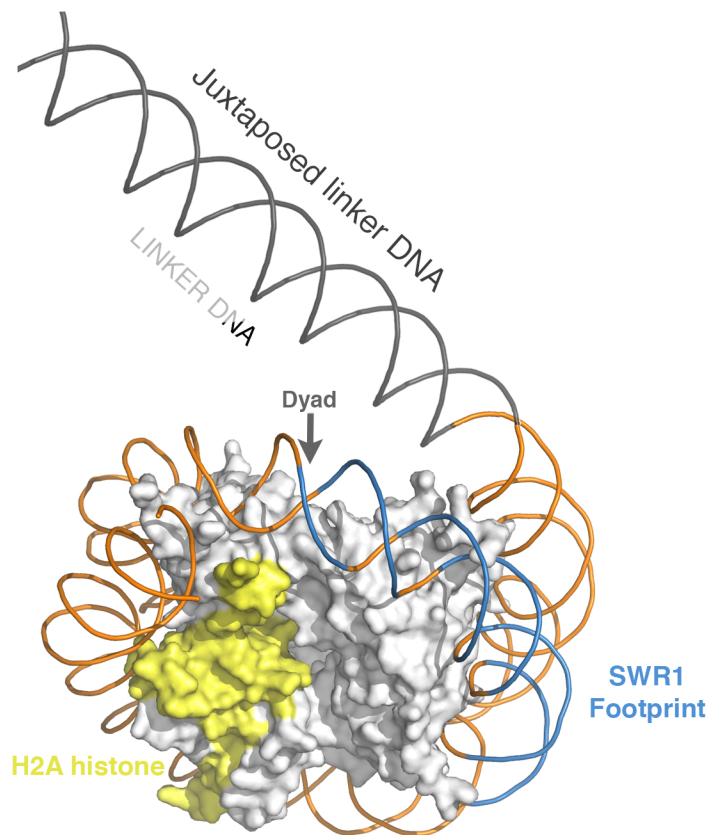

Fig S2

Supplement: supp [file elife-06845-supp-v1.zip]

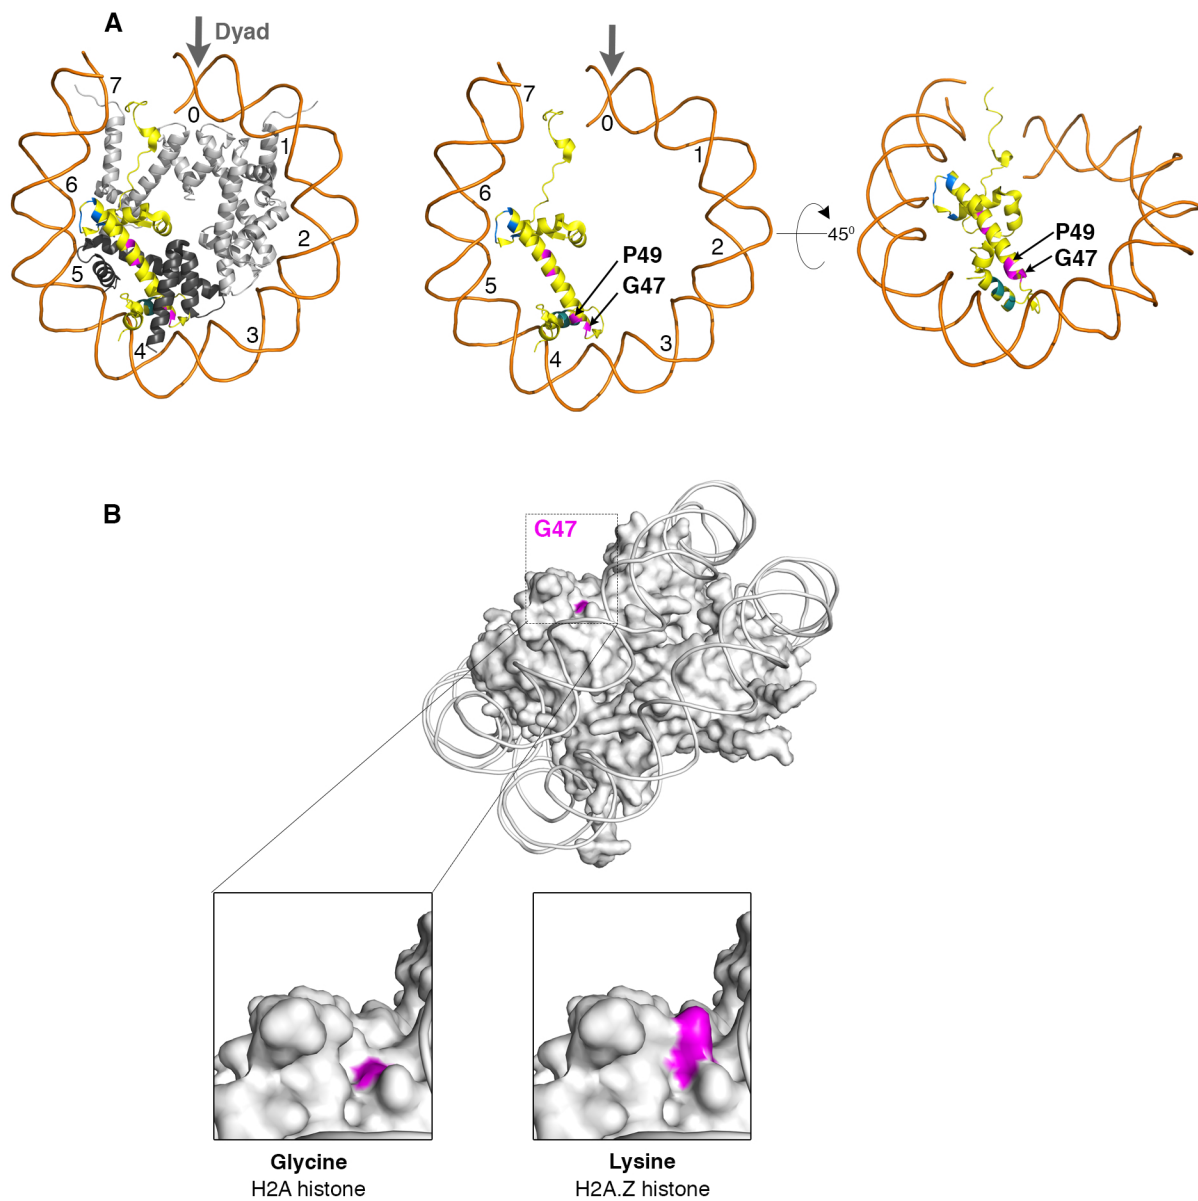

**Fig S1.3**

Supplement: supp [file elife-06845-supp-v1.zip]

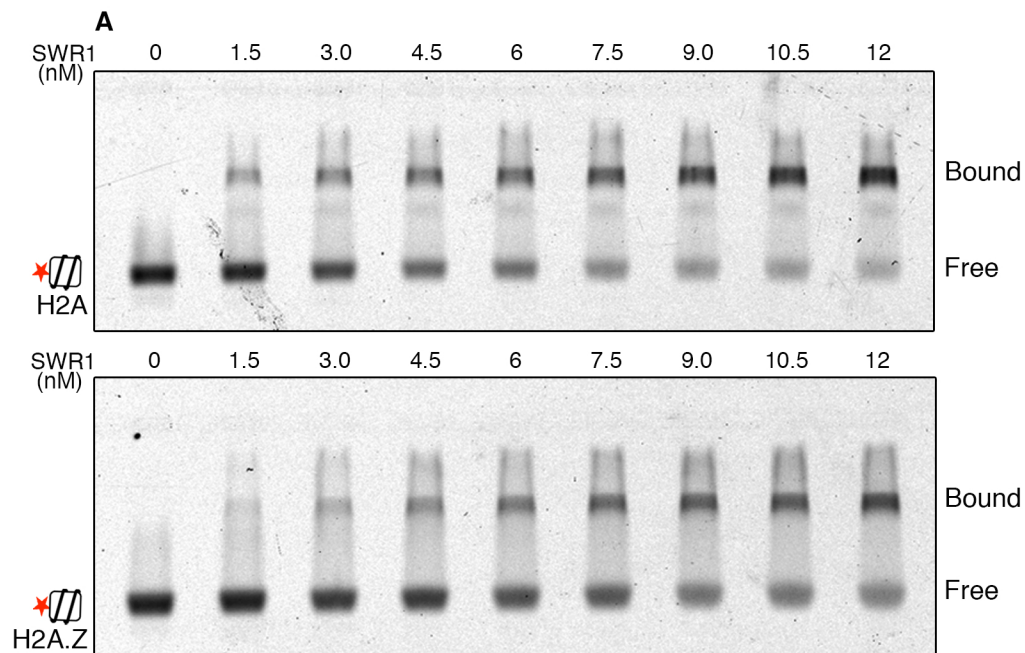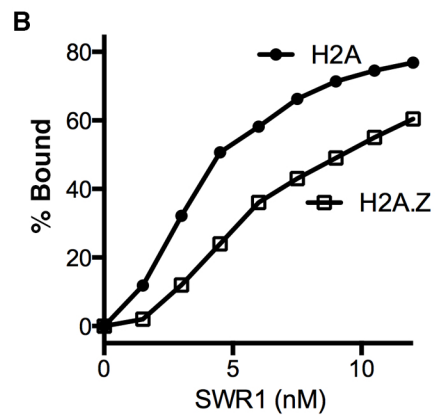

Fig S1.1

Supplement: supp [file elife-06845-supp-v1.zip]

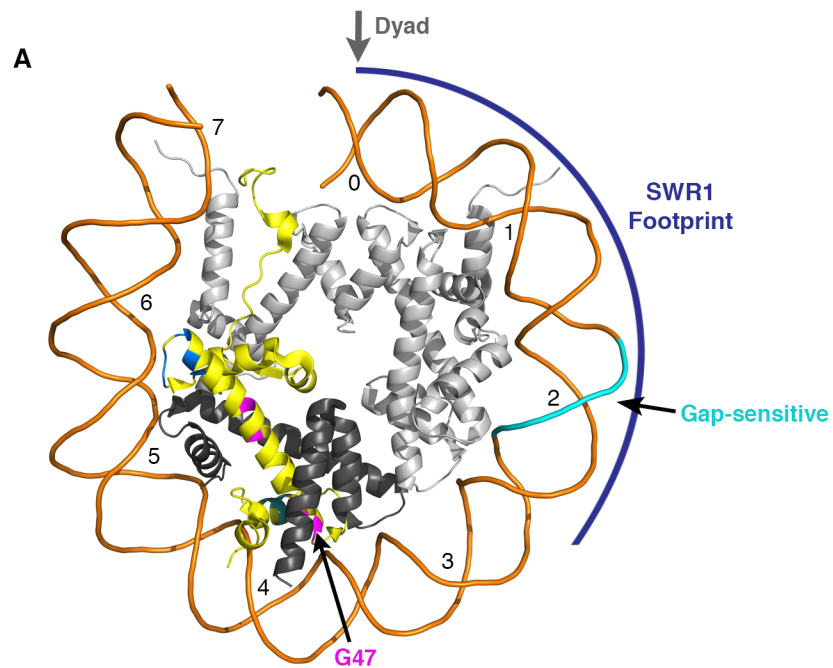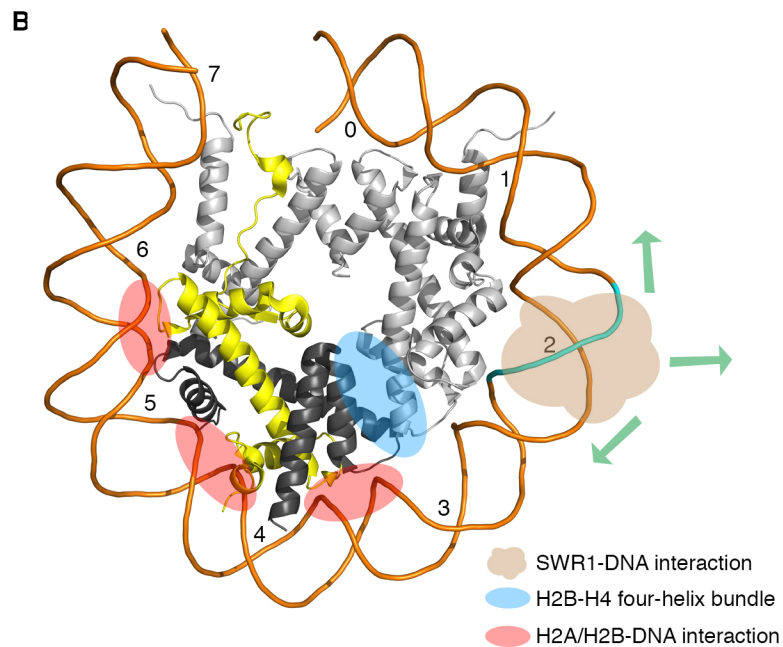

**Fig S3.2**

Supplement: supp [file elife-06845-supp-v1.zip]
